# Supplementary material
Source: HighWire-hosted journal article supplement (https://jnm.snmjournals.org/highwire/filestream/95348/field_highwire_adjunct_files/0/207142_Supplemental_Data.pdf)
Supplement: 207142_Supplemental_Data.pdf [file 207142_Supplemental_Data.pdf]

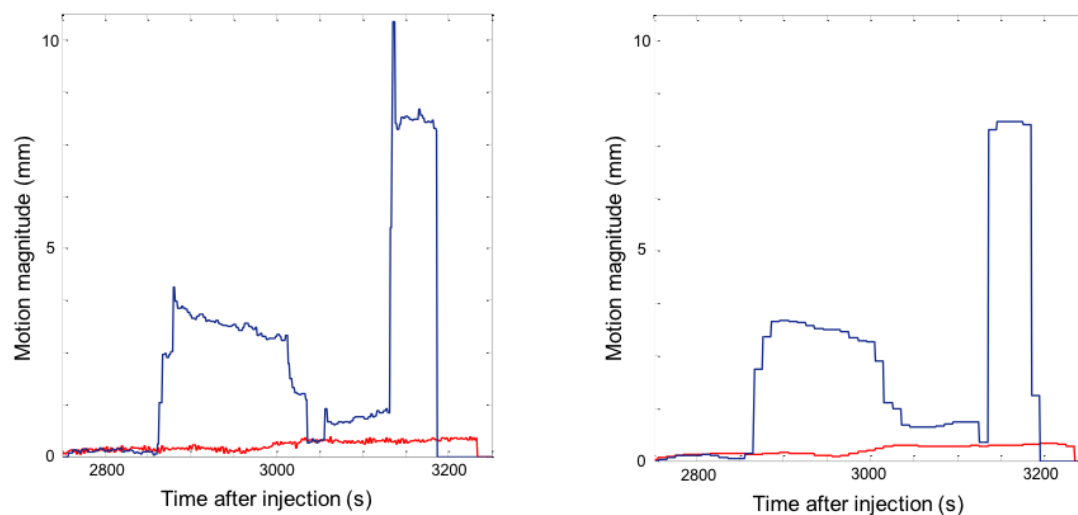

**Supplemental Figure 1** (left) The motion magnitude, as estimated by the vNav images, for a representative subject that moved the most and another representative subject that did not exhibit much motion. (right) The motion magnitude of the median-filtered motion parameters used in motion correction

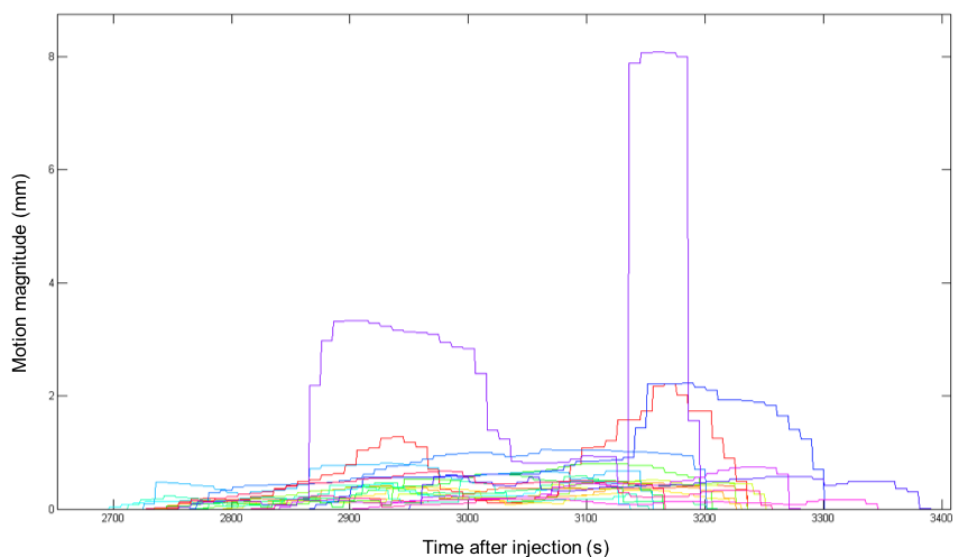

**Supplemental Figure 2** The motion magnitude curves for all subjects

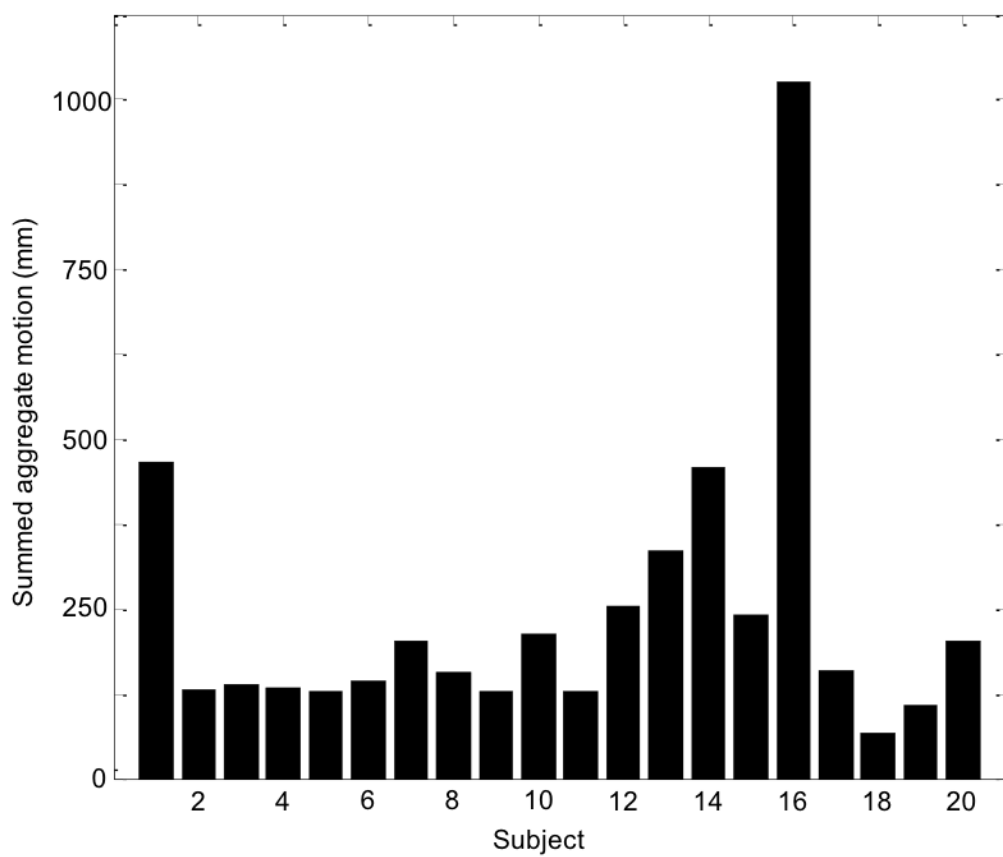

**Supplemental Figure 3** The summed aggregate motion parameters for all 20 subjects. One subject moved considerably more than the rest

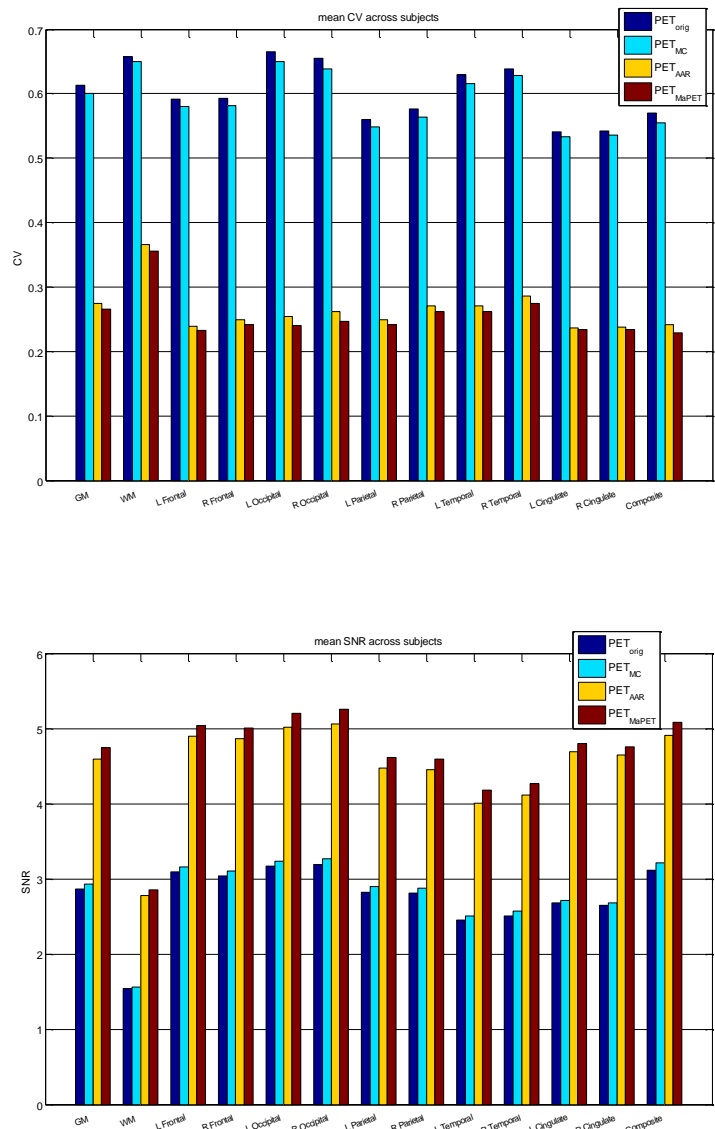

**Supplemental Figure 4** The mean (top) CV and (bottom) SNR values of PET<sub>orig</sub>, PET<sub>MC</sub>, PET<sub>AAR</sub>, and PET<sub>MaPET</sub> images across subjects for different brain regions
